# Supplementary material for: Differences Between Anticoagulated Patients With Ischemic Stroke Versus Intracerebral Hemorrhage
Source: PubMed Central journal article supplement — J Am Heart Assoc. 2021 Dec 22;11(1):e023345. doi: 10.1161/JAHA.121.023345 (PMC9075191; doi:10.1161/jaha.121.023345), 2021-12-22
Supplement: JAH3-11-e023345-s001.pdf [file JAH3-11-e023345-s001.pdf]

# **SUPPLEMENTAL MATERIAL**

**Table S1. Univariable logistic regression models for clinical characteristics with OR favoring ICH versus AIS/TIA (each row represents one model for one characteristic).**

| <b>Univariable model</b>                                      | <b>OR</b> | <b>95%-CI</b> | <b>p</b> |
|---------------------------------------------------------------|-----------|---------------|----------|
| female sex (versus male sex)                                  | 0.99      | 0.67; 1.45    | 0.95     |
| age (per 10 years increase)                                   | 1.10      | 0.90; 1.37    | 0.350    |
| NIHSS (per 1 point increase)                                  | 1.08      | 1.06; 1.11    | <0.001   |
| GCS (per 1 point decrease)                                    | 1.23      | 1.16; 1.30    | <0.001   |
| systolic blood pressure (per 10 mmHg increase)                | 1.20      | 1.12; 1.28    | <0.001   |
| diastolic blood pressure (per 10 mmHg increase)               | 1.28      | 1.15; 1.44    | <0.001   |
| eGFR (per 10 ml/min/1.73m <sup>2</sup> decrease)              | 0.89      | 0.83; 0.95    | <0.001   |
| hypertension                                                  | 1.32      | 0.78; 2.37    | 0.314    |
| diabetes mellitus                                             | 0.72      | 0.44; 1.15    | 0.168    |
| dyslipidemia                                                  | 0.57      | 0.38; 0.84    | 0.004    |
| atrial fibrillation                                           | 0.82      | 0.52; 1.30    | 0.388    |
| heart failure                                                 | 0.62      | 0.35; 1.03    | 0.065    |
| prosthetic heart valve                                        | 0.59      | 0.26; 1.20    | 0.151    |
| coronary artery disease                                       | 0.41      | 0.25; 0.67    | <0.001   |
| peripheral artery disease                                     | 0.67      | 0.33; 1.25    | 0.217    |
| prior AIS/TIA                                                 | 0.59      | 0.38; 0.89    | 0.011    |
| prior ICH                                                     | 4.37      | 2.16; 8.75    | <0.001   |
| prior gastrointestinal and/or other major bleeding            | 1.18      | 0.47; 2.63    | 0.704    |
| CHA <sub>2</sub> DS <sub>2</sub> -VASc (per 1 point increase) | 0.85      | 0.75; 0.95    | 0.005    |
| HAS-BLED (per 1 point increase)                               | 1.03      | 0.84; 1.26    | 0.750    |
| DOAC (versus VKA)                                             | 1.00      | 0.68; 1.47    | 1.000    |
| any additional antiplatelets                                  | 0.73      | 0.36; 1.33    | 0.311    |
| concomitant statins                                           | 0.84      | 0.57; 1.23    | 0.368    |

AIS = acute ischemic stroke, CI = confidence interval, DOAC = direct oral anticoagulant, eGFR = estimated glomerular filtration rate, GCS = Glasgow Coma Scale, ICH = intracerebral hemorrhage, NIHSS = National Institute of Health Stroke Scale, OR = odds ratio, TIA = transient ischemic attack, VKA = vitamin K antagonist.

**Table S2. Reduced multivariable model using Lasso regression for clinical characteristics with aOR favouring ICH versus AIS/TIA.**

| Variable                                           | aOR        | 95%-CI      | p      |
|----------------------------------------------------|------------|-------------|--------|
| female sex (versus male sex)                       | eliminated |             |        |
| age (per 10 years increase)                        | 1.36       | 1.04; 1.78  | 0.026  |
| systolic blood pressure (per 10 mmHg increase)     | 1.19       | 1.10; 1.28  | <0.001 |
| eGFR (per 10 ml/min/1.73m <sup>2</sup> decrease)   | 0.82       | 0.74; 0.89  | <0.001 |
| hypertension                                       | 1.37       | 0.73; 2.58  | 0.322  |
| diabetes mellitus                                  | 0.78       | 0.46; 1.32  | 0.348  |
| dyslipidemia                                       | 0.55       | 0.34; 0.89  | 0.015  |
| atrial fibrillation                                | eliminated |             |        |
| heart failure                                      | eliminated |             |        |
| prosthetic heart valve                             | 0.63       | 0.26; 1.53  | 0.312  |
| coronary artery disease                            | 0.48       | 0.27; 0.84  | 0.010  |
| peripheral artery disease                          | eliminated |             |        |
| prior AIS/TIA                                      | 0.52       | 0.32; 0.83  | 0.007  |
| prior ICH                                          | 6.31       | 2.88; 13.82 | <0.001 |
| prior gastrointestinal and/or other major bleeding | 2.07       | 0.81; 5.24  | 0.127  |
| DOAC (versus VKA)                                  | 0.86       | 0.56; 1.33  | 0.508  |
| any additional antiplatelets                       | eliminated |             |        |
| concomitant statins                                | 1.84       | 1.12; 3.02  | 0.016  |

AIS = acute ischemic stroke, aOR = adjusted odds ratio, CI = confidence interval, DOAC = direct oral anticoagulant, eGFR = estimated glomerular filtration rate, ICH = intracerebral hemorrhage, TIA = transient ischemic attack, VKA = vitamin K antagonist.

**Table S3. Clinical characteristics stratified by type of index event and whether MRI was performed.**

| <b>Characteristic</b>                                       | <b>AIS/TIA<br/>with MRI<br/>(n = 477)</b> | <b>AIS/TIA<br/>without MRI<br/>(n = 128)</b> | <b>ICH<br/>with MRI<br/>(n = 37)</b> | <b>ICH<br/>without MRI<br/>(n = 92)</b> |
|-------------------------------------------------------------|-------------------------------------------|----------------------------------------------|--------------------------------------|-----------------------------------------|
| female sex [n (%)]                                          | 198 (41.5)                                | 57 (44.5)                                    | 16 (43.2)                            | 38 (41.3)                               |
| age in years [median (IQR)]                                 | 82 (75 - 86)                              | 82 (75 - 87)                                 | 79 (76 - 83)                         | 82 (77 - 87)                            |
| NIHSS [median (IQR)]                                        | 3 (1 - 8)                                 | 7 (2 - 18)                                   | 7 (3 - 13)                           | 17 (6 - 22)                             |
| GCS [median (IQR)]                                          | 15 (14 - 15)                              | 15 (13 - 15)                                 | 15 (14 - 15)                         | 13 (9 - 14)                             |
| systolic blood pressure in mmHg [mean (SD)]                 | 150 (25)                                  | 146 (27)                                     | 159 (25)                             | 165 (33)                                |
| diastolic blood pressure in mmHg [mean (SD)]                | 83 (16)                                   | 81 (18)                                      | 87 (15)                              | 91 (17)                                 |
| eGFR in ml/min/1.73m <sup>2</sup> [median (IQR)]            | 56.6 (42.8 - 76.2)                        | 52.5 (34.3 - 67.5)                           | 77.8 (56.7 - 89.7)                   | 61.0 (44.7 - 82.8)                      |
| <b>concomitant medication</b>                               |                                           |                                              |                                      |                                         |
| VKA [n (%)]                                                 | 205 (43.0)                                | 67 (52.3)                                    | 13 (35.1)                            | 45 (48.9)                               |
| DOAC [n (%)]                                                | 272 (57.0)                                | 61 (47.7)                                    | 24 (64.9)                            | 47 (51.1)                               |
| any additional antiplatelets [n (%)]                        | 56 (11.7)                                 | 19 (14.8)                                    | 0 (0)                                | 12 (13.0)                               |
| additional dual antiplatelets [n (%)]                       | 2 (0.4)                                   | 1 (0.8)                                      | 0 (0)                                | 0 (0)                                   |
| concomitant statins [n (%)]                                 | 216 (45.3)                                | 54 (42.2)                                    | 16 (43.2)                            | 36 (39.1)                               |
| <b>medical history</b>                                      |                                           |                                              |                                      |                                         |
| hypertension [n (%)]                                        | 397 (83.2)                                | 107 (83.6)                                   | 34 (91.9)                            | 78 (84.8)                               |
| diabetes mellitus [n (%)]                                   | 112 (23.5)                                | 34 (26.6)                                    | 6 (16.2)                             | 18 (19.6)                               |
| dyslipidemia [n (%)]                                        | 229 (48.0)                                | 55 (43.0)                                    | 14 (37.8)                            | 29 (31.5)                               |
| atrial fibrillation [n (%)]                                 | 373 (78.2)                                | 112 (87.5)                                   | 32 (86.5)                            | 67 (72.8)                               |
| heart failure [n (%)]                                       | 80 (16.8)                                 | 46 (35.9)                                    | 4 (10.8)                             | 14 (15.2)                               |
| prosthetic heart valve [n (%)]                              | 48 (10.1)                                 | 13 (10.2)                                    | 0 (0.0)                              | 8 (8.7)                                 |
| coronary artery disease [n (%)]                             | 145 (30.4)                                | 49 (38.3)                                    | 5 (13.5)                             | 16 (17.4)                               |
| peripheral artery disease [n (%)]                           | 54 (11.3)                                 | 20 (15.6)                                    | 3 (8.1)                              | 8 (8.7)                                 |
| prior AIS/TIA [n (%)]                                       | 193 (40.5)                                | 47 (36.7)                                    | 5 (13.5)                             | 31 (33.7)                               |
| prior ICH [n (%)]                                           | 13 (2.7)                                  | 6 (4.7)                                      | 3 (8.1)                              | 13 (14.1)                               |
| prior gastrointestinal and/or other major bleeding [n (%)]  | 21 (4.4)                                  | 7 (5.5)                                      | 2 (5.4)                              | 5 (5.4)                                 |
| CHA <sub>2</sub> DS <sub>2</sub> -VASc score [median (IQR)] | 5 (4 - 6)                                 | 5 (4 - 6)                                    | 4 (3 - 5)                            | 4 (3 - 6)                               |
| HAS-BLED score [median (IQR)]                               | 2 (1 - 3)                                 | 2 (2 - 3)                                    | 2 (1 - 2)                            | 2 (2 - 3)                               |

AIS = acute ischemic stroke, DOAC = direct oral anticoagulant, eGFR = estimated glomerular filtration rate, GCS = Glasgow Coma Scale, ICH = intracerebral hemorrhage, IQR = interquartile range, MRI = magnetic resonance imaging, NIHSS = National Institute of Health Stroke Scale, SD = standard deviation, TIA = transient ischemic attack, VKA = vitamin K antagonist.

**Table S4. Logistic regression models for atherosclerosis assessment on CTA with (a)OR favoring ICH versus AIS/TIA (univariable unadjusted models [1A – 9A] and models adjusted for CHA<sub>2</sub>DS<sub>2</sub>-VASc and HAS-BLED [1B – 9B] for each CTA variable; each row represents one model for one CTA variable)**

| Model                                          | (A) unadjusted estimates |            |        | (B) estimates adjusted for CHA <sub>2</sub> DS <sub>2</sub> -VASc and HAS-BLED |            |       |
|------------------------------------------------|--------------------------|------------|--------|--------------------------------------------------------------------------------|------------|-------|
|                                                | OR                       | 95%-CI     | p      | aOR                                                                            | 95%-CI     | p     |
| Model 1: any atherosclerosis                   | 0.62                     | 0.38; 1.04 | 0.070  | 0.71                                                                           | 0.42; 1.22 | 0.206 |
| Model 2: aortic arch                           | 0.50                     | 0.29; 0.83 | 0.006  | 0.54                                                                           | 0.31; 0.90 | 0.018 |
| Model 3: common carotid artery                 | 0.27                     | 0.04; 0.89 | 0.030  | 0.29                                                                           | 0.05; 0.97 | 0.043 |
| Model 3: internal carotid artery               | 0.45                     | 0.29; 0.71 | <0.001 | 0.48                                                                           | 0.30; 0.76 | 0.002 |
| Model 3: internal carotid artery stenosis ≥50% | 0.33                     | 0.13; 0.68 | 0.002  | 0.32                                                                           | 0.13; 0.67 | 0.002 |
| Model 6: carotid siphon                        | 0.74                     | 0.47; 1.16 | 0.182  | 0.81                                                                           | 0.51; 1.29 | 0.366 |
| Model 7: middle cerebral artery, M1 segment    | 0.22                     | 0.01; 1.08 | 0.065  | 0.22                                                                           | 0.01; 1.09 | 0.068 |
| Model 8: vertebral artery                      | 0.68                     | 0.39; 1.15 | 0.153  | 0.71                                                                           | 0.40; 1.22 | 0.217 |
| Model 9: basilar artery                        | 0.65                     | 0.15; 1.92 | 0.474  | 0.68                                                                           | 0.16; 2.05 | 0.531 |

AIS = acute ischemic stroke, (a)OR = adjusted odds ratio, CI = confidence interval, CTA = computed tomography angiography, ICH = intracerebral hemorrhage, TIA = transient ischemic attack.

**Table S5. Logistic regression models for the interaction of anticoagulant type (DOAC or VKA) with clinical, MRI and CTA characteristics on their association with event type (ICH versus AIS/TIA).** For each anticoagulant subgroup the model-based odds ratio and 95% confidence interval for ICH versus AIS/TIA is presented, along with the p value for interaction. Each row represents one model for one clinical, MRI, or CTA characteristic.

| Model                                              | DOAC subgroup |             | VKA subgroup |             | Pinteraction |
|----------------------------------------------------|---------------|-------------|--------------|-------------|--------------|
|                                                    | OR            | 95%-CI      | OR           | 95%-CI      |              |
| female sex (versus male sex)                       | 0.82          | 0.49; 1.38  | 1.24         | 0.69; 2.20  | 0.296        |
| age (per 10 years increase)                        | 0.95          | 0.72; 1.26  | 1.35         | 0.98; 1.91  | 0.107        |
| systolic blood pressure (per 10 mmHg increase)     | 1.23          | 1.11; 1.36  | 1.17         | 1.06; 1.29  | 0.509        |
| eGFR (per 10 ml/min/1.73m <sup>2</sup> decrease)   | 0.86          | 0.78; 0.94  | 0.91         | 0.83; 1.01  | 0.391        |
| hypertension                                       | 1.36          | 0.67; 3.08  | 1.27         | 0.59; 3.06  | 0.903        |
| diabetes mellitus                                  | 0.45          | 0.21; 0.88  | 1.20         | 0.60; 2.30  | 0.050        |
| dyslipidemia                                       | 0.60          | 0.34; 1.02  | 0.53         | 0.29; 0.94  | 0.763        |
| atrial fibrillation                                | 1.12          | 0.59; 2.31  | 0.60         | 0.33; 1.15  | 0.182        |
| heart failure                                      | 0.95          | 0.45; 1.86  | 0.38         | 0.15; 0.83  | 0.099        |
| prosthetic heart valve                             | 0.94          | 0.14; 3.65  | 0.50         | 0.18; 1.15  | 0.506        |
| coronary artery disease                            | 0.50          | 0.25; 0.95  | 0.33         | 0.14; 0.66  | 0.398        |
| peripheral artery disease                          | 0.68          | 0.25; 1.55  | 0.66         | 0.22; 1.63  | 0.972        |
| prior AIS/TIA                                      | 0.54          | 0.30; 0.93  | 0.66         | 0.35; 1.20  | 0.628        |
| prior ICH                                          | 4.80          | 1.92; 11.87 | 3.81         | 1.21; 11.41 | 0.749        |
| prior gastrointestinal and/or other major bleeding | 1.09          | 0.24; 3.48  | 1.27         | 0.35; 3.66  | 0.859        |
| any additional antiplatelets                       | 0.63          | 0.21; 1.52  | 0.82         | 0.32; 1.84  | 0.681        |
| concomitant statins                                | 0.61          | 0.35; 1.03  | 1.21         | 0.69; 2.14  | 0.082        |
| CMB presence (versus absence)                      | 3.33          | 1.35; 9.40  | 2.02         | 0.64; 7.65  | 0.529        |
| CMB location (versus no CMB)                       |               |             |              |             |              |
| purely superficial                                 | 3.69          | 1.10; 12.37 | 1.88         | 0.45; 7.43  |              |
| purely deep                                        | 0.83          | 0.04; 5.12  | 1.68         | 0.08; 11.66 | 0.229        |
| mixed location                                     | 6.46          | 2.32; 19.68 | 1.24         | 0.25; 5.25  |              |
| CMB count (per 1 CMB increase)                     | 1.08          | 1.03; 1.13  | 1.03         | 0.95; 1.09  | 0.209        |
| CMB count categorical (versus no CMB)              |               |             |              |             |              |
| n = 1 CMB                                          | 1.52          | 0.31; 6.01  | 1.62         | 0.22; 8.71  |              |
| n = 2-10 CMB                                       | 3.69          | 1.35; 11.10 | 1.96         | 0.50; 8.17  | 0.741        |
| n >10 CMB                                          | 8.67          | 1.98;35.30  | 3.03         | 0.40; 16.92 |              |
| ARWMC scale 2-3 (versus ARWMC scale 0-1)           | 1.69          | 0.73; 4.15  | 2.29         | 0.72; 8.68  | 0.685        |
| any atherosclerosis                                | 0.53          | 0.27; 1.05  | 0.75         | 0.35; 1.72  | 0.494        |
| aortic arch                                        | 0.44          | 0.19; 0.92  | 0.55         | 0.26; 1.09  | 0.695        |
| common carotid artery                              | 0.30          | 0.02; 1.49  | 0.24         | 0.01; 1.20  | 0.884        |
| internal carotid artery                            | 0.42          | 0.22; 0.78  | 0.48         | 0.25; 0.92  | 0.770        |

|                                              |      |            |      |            |       |
|----------------------------------------------|------|------------|------|------------|-------|
| internal carotid artery stenosis $\geq 50\%$ | 0.28 | 0.07; 0.80 | 0.37 | 0.11; 0.98 | 0.726 |
| carotid siphon                               | 0.74 | 0.40; 1.37 | 0.72 | 0.37; 1.40 | 0.950 |
| vertebral artery                             | 0.93 | 0.44; 1.85 | 0.46 | 0.18; 1.02 | 0.206 |
| basilar artery                               | 0.46 | 0.02; 2.40 | 0.83 | 0.13; 3.19 | 0.642 |

AIS = acute ischemic stroke, CI = confidence interval, CTA = computed tomography angiography, DOAC = direct oral anticoagulant, eGFR = estimated glomerular filtration rate, GCS = Glasgow Coma Scale, ICH = intracerebral hemorrhage, MRI = magnetic resonance imaging, NIHSS = National Institute of Health Stroke Scale, OR = odds ratio, TIA = transient ischemic attack, VKA = vitamin K antagonist, CMB = cerebral microbleeds, ARWMC = age-related white matter changes,

**Figure S1. Eligibility flowchart.**

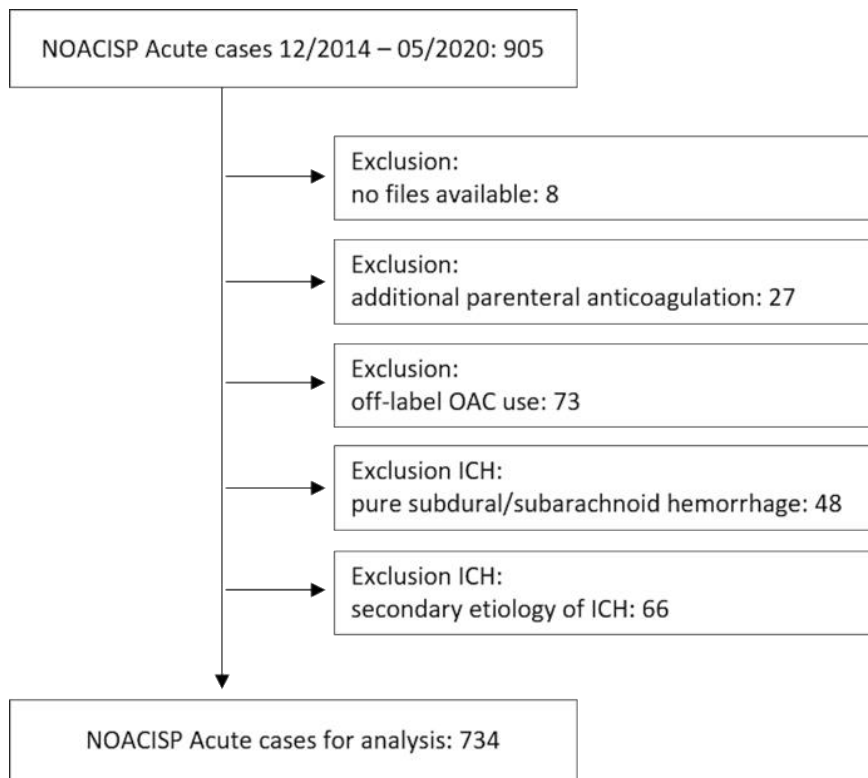

The same patient might be excluded for multiple reasons. ICH = intracerebral hemorrhage, NOACISP = Novel Oral Anticoagulants In Stroke Patients, OAC = oral anticoagulant.
